# Supplementary material
Source: PubMed Central journal article supplement (PMC5242184)
Supplement: NIHMS807385-supplement-Supporting_Information.pdf [file NIHMS807385-supplement-Supporting_Information.pdf]

## Supporting Information

### Magnetic multivalent trehalose glycopolymer nanoparticles for the detection of mycobacteria

By Xuan Chen,<sup>1</sup> Bin Wu,<sup>1</sup> Kalana W. Jayawardana,<sup>1</sup> Nanjing Hao,<sup>1</sup> H. Surangi N. Jayawardana,<sup>2</sup> Robert Langer,<sup>2\*</sup> Ana Jaklenec,<sup>2\*</sup> and Mingdi Yan<sup>1\*</sup>

Xuan Chen, Bin Wu, Dr. Kalana W. Jayawardana, Dr. Nanjing Hao, Prof. Mingdi Yan  
Department of Chemistry  
University of Massachusetts  
Lowell, MA 01854 (USA)  
E-mail: [mingdi\\_yan@uml.edu](mailto:mingdi_yan@uml.edu)

Dr. H. Surangi N. Jayawardana, Dr. Ana Jaklenec, Prof. Robert Langer  
David H. Koch Institute of Integrative Cancer Research Centre  
Massachusetts Institute of Technology  
Cambridge, MA 02139 (USA)  
E-mail: [rlanger@mit.edu](mailto:rlanger@mit.edu), [jaklenec@mit.edu](mailto:jaklenec@mit.edu)

|                                                                                                                                           |   |
|-------------------------------------------------------------------------------------------------------------------------------------------|---|
| Table of Contents.....                                                                                                                    | 1 |
| Materials.....                                                                                                                            | 2 |
| Synthesis of 3-benzyloxy-2-hydroxypropionic acid ( <b>a</b> ).....                                                                        | 3 |
| Synthesis of 3-(benzyloxy)-2-(2-bromopropanoyloxy)propanoic acid ( <b>b</b> ).....                                                        | 4 |
| Synthesis of 3-(benzyloxy)-2-(2-iodopropanoyloxy)propanoic acid ( <b>c</b> ).....                                                         | 5 |
| Synthesis of 3-(benzyloxymethyl)-6-methyl-1,4-dioxane-2,5-dione ( <b>1</b> ).....                                                         | 5 |
| Synthesis of copolymer <b>3</b> .....                                                                                                     | 6 |
| Synthesis of copolymer <b>4</b> .....                                                                                                     | 6 |
| Synthesis of copolymer <b>5</b> .....                                                                                                     | 7 |
| Synthesis of 4,6-benzylidene- $\alpha,\alpha$ -D-trehalose ( <b>d</b> ).....                                                              | 8 |
| Synthesis of 4,6-benzylidene-2,2',3,3',6'-penta- <i>O</i> -acetyl- $\alpha,\alpha$ -D-trehalose ( <b>e</b> ).....                         | 8 |
| Synthesis of 4- <i>O</i> -benzoyl-6-bromo-2,2',3,3',4',6'-penta- <i>O</i> -acetyl-6-deoxy- $\alpha,\alpha$ -D-trehalose ( <b>f</b> )..... | 8 |

|                                                                                                                                           |    |
|-------------------------------------------------------------------------------------------------------------------------------------------|----|
| Synthesis of 4- <i>O</i> -benzoyl-6-azido-2,2',3,3',4',6'-penta- <i>O</i> -acetyl-6-deoxy- $\alpha,\alpha$ -D-trehalose ( <b>g</b> )..... | 9  |
| Synthesis of 6-azido-6-deoxy- $\alpha,\alpha$ -D-trehalose ( <b>6</b> ).....                                                              | 10 |
| Synthesis of glycopolymer <b>7</b> .....                                                                                                  | 10 |
| Calculation of the trehalose content.....                                                                                                 | 11 |
| Synthesis of SPIONs.....                                                                                                                  | 11 |
| SPIONs encapsulation.....                                                                                                                 | 12 |
| Binding of magnetic micelles with lectin.....                                                                                             | 12 |
| Binding of magnetic micelles with bacteria.....                                                                                           | 12 |
| Mycobacteria detection.....                                                                                                               | 13 |
| Bacterial viability assay.....                                                                                                            | 13 |
| Characterization.....                                                                                                                     | 13 |
| GPC spectra (Figure S1).....                                                                                                              | 14 |
| TEM image of SPIONs in water (Figure S2).....                                                                                             | 14 |
| Image of Con A-treated glycopolymer micelles (Figure S3).....                                                                             | 14 |
| TEM and optical images of magnetic micelle-treated bacteria (Figure S4 – S7).....                                                         | 15 |
| <sup>1</sup> H NMR/FT-IR spectra (Figure S8- S28).....                                                                                    | 16 |
| Results of bacterial viability tests (Table S1).....                                                                                      | 26 |

## Materials

Benzaldehyde dimethyl acetal, *p*-toluenesulfonic acid, sodium chloride, triethylamine, acetic anhydride, 4-dimethylaminopyridine, hexane, carbon tetrachloride, calcium carbonate, *N*-bromosuccinimide, sodium bicarbonate, sodium azide, sodium methoxide, isopropanol, Amberlite IRC-120 H<sup>+</sup> resin, methanol, trifluoroacetic acid (TFA), sodium nitrite, magnesium sulfate, sodium sulfate, acetic acid, potassium iodide, celite, *N,N*-Diisopropylethylamine (DIEA), tin octoate, Pd(OH)<sub>2</sub> on charcoal, *N,N'*-Dicyclohexylcarbodiimide (DCC), pent-4-ynoic acid, copper (I) bromide, phosphorus pentoxide, pentamethyldiethylenetriamine, iron (III) acetylacetonate, 1,2-hexadecanediol, oleic acid, tetrahydrofuran, ethanol, oleylamine, concanavalin A (Con A) and bovine serum albumin (BSA) were purchased from Sigma-

Aldrich and used without further purification. Trehalose anhydrate and 2-bromopropionyl chloride were purchased from TCI-America and used as received. *O*-Benzyl-L-serine was purchased from Chem Impex. Dichloromethane, dimethylformamide, ethyl acetate and dimethyl sulfoxide were purified by distillation over CaH<sub>2</sub>. Acetone was distilled from phosphorus pentoxide. Amberlite IRC-120 H<sup>+</sup> resin was activated by washing with NaOH and HCl followed by water. High purity L-lactide was obtained by recrystallization from anhydrous EtOAc. Dialysis membrane (molecule weight cutoff: 3500) was purchased from Spectrum Labs.

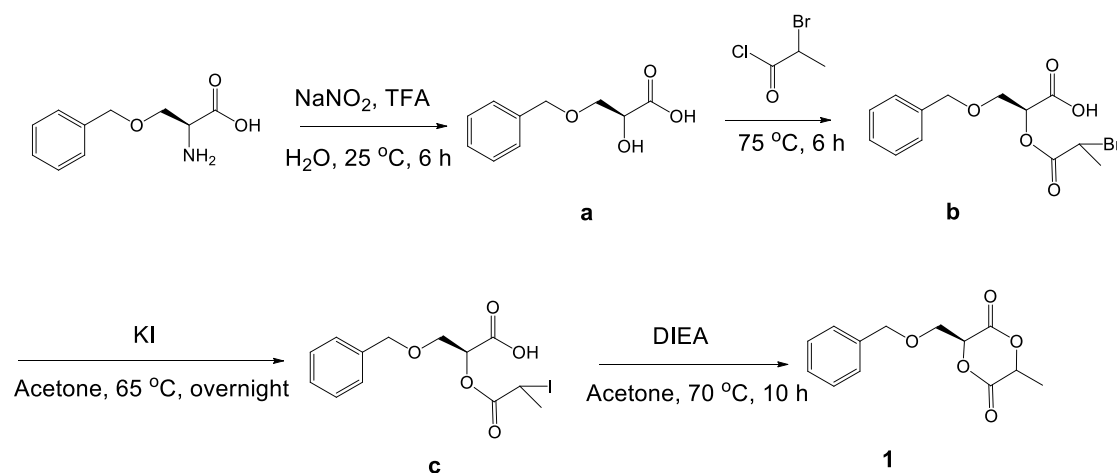

**Scheme S1.** Synthesis of (3-(benzyloxymethyl)-6-methyl-1,4-dioxane-2,5-dione) (**1**).

### Synthesis of 3-benzyloxy-2-hydroxypropionic acid (**a**)<sup>[1]</sup>

To a 200 mL aqueous solution of 0.7 M trifluoroacetic acid, *O*-benzyl-L-serine (10.0 g, 52 mmol) was added, and the mixture was stirred at room temperature until all the solid was dissolved. An aqueous solution of NaNO<sub>2</sub> (50 mL, 1.5 M) was added dropwise with a syringe pump under Ar protection, and the reaction was stirred for another 3 hours. After the consumption of the starting material was confirmed by TLC, NaCl (10.0 g) was added, and the solution was extracted with ethyl acetate for three times followed by washing with brine and drying over MgSO<sub>4</sub>. After flash column chromatography using CH<sub>2</sub>Cl<sub>2</sub>/MeOH/AcOH

(v/v/v 100:8:1), the title compound **a** was obtained as a yellow liquid (7.2 g, 72 %).  $^1\text{H NMR}$  (500 MHz, DMSO- $d_6$ ):  $\delta$  7.41-7.20 (m, 5H, Ar H), 5.33 (s, 1H; -OH), 4.51 (q,  $J = 12.2$  Hz, 2H; ArCH<sub>2</sub>O-), 4.16 (t,  $J = 4.2$  Hz, 1H; -OCH<sub>2</sub>CH(COOH)O-) 3.62 (d,  $J = 4.4$  Hz, 2H; -OCH<sub>2</sub>CH-); IR (ATR): 3324 (m,  $\nu_s$ (carboxylic and alcoholic O-H)), 3033 (m,  $\nu_s$ (aromatic C-H)), 2915 (w,  $\nu_{as}$ (-CH<sub>2</sub>-)), 2871 (w,  $\nu_s$ (-CH<sub>2</sub>- and aliphatic -CH-)), 2645 (w), 2537 (w), 1693 (vs,  $\nu_s$ (carboxylic C=O)), 1495 (w), 1455 (m,  $\delta_s$ (-CH<sub>2</sub>-)), 1412 (m), 1363 (w), 1274 (s), 1225 (m), 1202 (m), 1102 (vs), 1038 (m), 1019 (m), 926 (s), 826 (s), 791 (w), 732 (m,  $\omega$ (aromatic C-H)), 697 (m,  $\tau$ (aromatic ring)), 653 (m), 610 (m), 557 (m)  $\text{cm}^{-1}$ .

### Synthesis of 3-(benzyloxy)-2-(2-bromopropanoyloxy)propanoic acid (**b**)<sup>[1]</sup>

Compound **a** (10.0 g, 51 mmol) and 2-bromopropionyl chloride (6.3 mL, 61.2 mmol) were mixed in a 50 mL flask filled with Ar. The reaction mixture was heated to 70 °C and stirred for 6 hours. Upon the completion of the reaction, the crude product was heated at 60 °C under reduced pressure to remove unreacted 2-bromopropionyl chloride and 2-bromopropionyl acid. After cooling down to room temperature, the residue was washed with water and extracted with ethyl acetate 3 times. The combined organic phase was washed with brine and dried over MgSO<sub>4</sub>. The product was further purified by flash column chromatography using CH<sub>2</sub>Cl<sub>2</sub>/MeOH/AcOH (v/v/v 100:2:0.5) to give **b** as a light brown viscous liquid (12.6 g, 75%).  $^1\text{H NMR}$  (500 MHz, CDCl<sub>3</sub>): 7.60-7.27 (m, 5H, Ar H), 5.33 (dd,  $J = 5.2, 2.6$  Hz, 1H; -OCH<sub>2</sub>CH(COOH)O-), 4.73-4.33 (m, 3H; ArCH<sub>2</sub>O- and -OCCH(Br)CH<sub>3</sub>), 4.03-3.79 (m, 2H; -OCH<sub>2</sub>CH-), 1.87 (m, 3H; -CH(Br)CH<sub>3</sub>); IR (ATR): 3442 (w,  $\nu_s$ (carboxylic O-H)), 3032 (w,  $\nu_s$ (aromatic C-H)), 2928 (w,  $\nu_{as}$ (-CH<sub>2</sub>- and -CH<sub>3</sub>)), 2871 (w,  $\nu_s$ (-CH<sub>2</sub>- and aliphatic -CH-)), 2616 (w), 1732 (vs,  $\nu_s$ (ester C=O)), 1497 (w), 1452 (m,  $\delta_s$ (-CH<sub>2</sub>-)), 1211 (m), 1155 (w), 1097 (m), 985 (w), 738 (m,  $\omega$ (aromatic C-H)), 697 (m,  $\tau$ (aromatic ring))  $\text{cm}^{-1}$ .

**Synthesis of 3-(benzyloxy)-2-(2-iodopropanoyloxy)propanoic acid (c)**<sup>[1]</sup>

Compound **b** (8.0 g, 24 mmol) and potassium iodide (40 g, 0.24 mol) were dissolved in dry acetone (100 mL). The reaction was heated at 60 °C overnight under Ar. Then, the solid salt was removed by passing through celite and the filtrate was concentrated under vacuum. Ethyl acetate was added to the oily residue and the solution was filtered again to remove trace potassium iodide/potassium bromide. The organic phase was washed with 2 M aq. Na<sub>2</sub>S<sub>2</sub>O<sub>3</sub> three times and dried over MgSO<sub>4</sub>. (Na<sub>2</sub>S<sub>2</sub>O<sub>3</sub> was used to remove I<sub>2</sub>.) After evaporation of the solvent, compound **c** was obtained as a brown viscous liquid (7.5 g, 82%). The product was used directly without further purification. <sup>1</sup>H NMR (500 MHz, CDCl<sub>3</sub>): δ 7.52-7.28 (m, 5H, Ar H), 5.31 (m, 1H; -OCH<sub>2</sub>CH(COOH)O-), 4.74-4.41 (m, 3H; ArCH<sub>2</sub>O- and -OCCH(Br)CH<sub>3</sub>), 4.00-3.80 (dd, J = 48.3, 10.4 Hz, 2H; -OCH<sub>2</sub>CH-), 2.02 (m, 3H; -CH(I)CH<sub>3</sub>); IR (ATR): 3440 (w, ν<sub>s</sub>(carboxylic O-H)), 3030 (w, ν<sub>s</sub>(aromatic C-H)), 2924 (w, ν<sub>as</sub>(-CH<sub>2</sub>- and -CH<sub>3</sub>)), 2867 (w, ν<sub>s</sub>(-CH<sub>2</sub>- and aliphatic -CH-)), 2620 (w), 1728 (vs, ν<sub>s</sub>(ester C=O)), 1496 (w), 1452 (m, δ<sub>s</sub>(-CH<sub>2</sub>-)), 1362 (w), 1197 (w), 1124 (s), 1094 (s), 1043 (s), 977 (w), 909 (w), 737 (m, ω(aromatic C-H)), 697 (m, τ(aromatic ring)) cm<sup>-1</sup>.

**Synthesis of 3-(benzyloxymethyl)-6-methyl-1,4-dioxane-2,5-dione (1)**<sup>[1]</sup>

A solution of compound **c** (10.0 g, 26.8 mmol) in dry CH<sub>2</sub>Cl<sub>2</sub> (100 mL) was added dropwise to refluxing dry acetone (1 L) containing DIEA (8.8 mL, 53.6 mmol) under Ar. It took 10 hours to finish the addition and the reaction was refluxed for another hour. The solvents were removed under reduced pressure and ether was added to dissolve the crude product. Insoluble ammonium iodide was filtered and the filtrate was concentrated. After purification by flash column chromatography using hexane/ethyl acetate (v/v 4:1), the title compound **1** was obtained as a yellow oil (2.1 g, 31%). The diastereomers were used directly without further separation. <sup>1</sup>H NMR (500 MHz, CDCl<sub>3</sub>): (SS) δ 7.44-7.27 (m, 5H, Ar H), 5.00-5.12 (m, 2H; -

OCCH(CH<sub>2</sub>O-)O- and -OCCH(CH<sub>3</sub>O-), 4.58 (d, J = 23.5 Hz, 2H; ArCH<sub>2</sub>O-), 3.98 (d, J = 3.7 Hz, 2H; -OCH<sub>2</sub>CH-), 1.63 (m, 3H; -CHCH<sub>3</sub>); (RS)  $\delta$  7.44-7.27 (m, 5H, Ar H), 5.24 (q, J = 7.0 Hz, 1H; -OCCH(CH<sub>2</sub>O-)O-), 5.00-5.12 (m, 1H; -OCCH(CH<sub>2</sub>O-)O- and -OCCH(CH<sub>3</sub>O-), 3.98 (d, J = 23.5 Hz, 2H; ArCH<sub>2</sub>O-), 4.06 (dd, J = 10.2, 2.0 Hz, 1H; -OCH<sub>2</sub>CH-), 3.91 (dd, J = 10.6, 2.6 Hz, 1H; -OCH<sub>2</sub>CH-) 1.63 (m, 3H; -CHCH<sub>3</sub>); IR (ATR): 2993 (w,  $\nu_s$ (aromatic C-H)), 2942 (w,  $\nu_{as}$ (-CH<sub>2</sub>- and -CH<sub>3</sub>)), 2872 (w,  $\nu_s$ (-CH<sub>2</sub>- and aliphatic -CH-)), 1747 (vs,  $\nu_s$ (ester C=O)), 1453 (m,  $\delta_s$ (-CH<sub>2</sub>-)), 1365 (w), 1268 (w), 1182 (s), 1084 (vs), 1046 (m), 865 (w), 739 (m,  $\omega$ (aromatic C-H)), 698 (m,  $\tau$ (aromatic ring)) cm<sup>-1</sup>.

### Synthesis of copolymer 3<sup>[1]</sup>

Monomer **1** (1.0 g, 4.0 mmol), L-lactide (**2**) (1.0 g, 6.9 mmol) and a solution of Sn(oct)<sub>2</sub> 10 mg in dry toluene (1 mL) were added into a 5-mL round bottom flask. The mixture was heated to 70 °C under vacuum for 1 hour. The flask was filled with Ar and the temperature was increased to 140 °C. The mixture was stirred until the stir-bar stopped moving. After cooling to room temperature, the solid was dissolved in CH<sub>2</sub>Cl<sub>2</sub>. Hexanes were added and the precipitates were dried to give copolymer **3** as a dark brown powder (1.48 g, 74%). <sup>1</sup>H NMR (500 MHz, CDCl<sub>3</sub>):  $\delta$  7.33 (Ar H), 5.45-5.00 (-OCCH(CH<sub>2</sub>O-)O- and -OCCH(CH<sub>3</sub>O-), 4.59 (ArCH<sub>2</sub>O-), 3.93 (-OCH<sub>2</sub>CH-), 1.57 (-CHCH<sub>3</sub>); IR (ATR): 2994 (w,  $\nu_s$ (aromatic C-H)), 2944 (w,  $\nu_{as}$ (-CH<sub>2</sub>- and -CH<sub>3</sub>)), 2872 (w,  $\nu_s$ (-CH<sub>2</sub>- and aliphatic -CH-)), 1747 (vs,  $\nu_s$ (ester C=O)), 1453 (m,  $\delta_s$ (-CH<sub>2</sub>-)), 1364 (w), 1267 (w), 1182 (s), 1082 (vs), 1046 (m), 865 (w), 740 (m,  $\omega$ (aromatic C-H)), 699 (m,  $\tau$ (aromatic ring)) cm<sup>-1</sup>.

### Synthesis of copolymer 4<sup>[1]</sup>

Copolymer **3** (1.0 g) was dissolved in 50 mL ethyl acetate/methanol (3:1) and Pd(OH)<sub>2</sub>/C was added. The mixture was purged with Ar for 20 min, and was then filled with H<sub>2</sub> under vigorous stirring. After 12 hours, the solution was filtered through a pile of celite to remove

$\text{Pd}(\text{OH})_2/\text{C}$ , and the filtrate was dried under vacuum to give copolymer **3** as a light brown solid (630 mg, 63%).  $^1\text{H}$  NMR (500 MHz,  $\text{CDCl}_3$ ):  $\delta$  5.0-5.5 (-OCCH( $\text{CH}_2\text{OH}$ )O- and -OCCH( $\text{CH}_3$ )O-), 4.00 (HOCH<sub>2</sub>CH-), 1.59 (-CHCH<sub>3</sub>); IR (ATR): 3501 (w,  $\nu_s$ (alcoholic O-H)), 2992 (w), 2945 (w,  $\nu_{\text{as}}$ (-CH<sub>2</sub>- and -CH<sub>3</sub>)), 2876 (w,  $\nu_s$ (-CH<sub>2</sub>- and aliphatic -CH-)), 1744 (vs,  $\nu_s$ (ester C=O)), 1452 (m,  $\delta_s$ (-CH<sub>2</sub>-)), 1380 (m), 1182 (s), 1129 (m), 1084 (vs), 864 (w), 743 (w)  $\text{cm}^{-1}$ .

### Synthesis of copolymer 5

Copolymer **4** (100 mg) and pent-4-ynoic acid (40 mg, 0.41 mmol) were added into dry  $\text{CH}_2\text{Cl}_2$  (10 mL) containing DCC (218 mg, 0.82 mmol) and a catalytic amount of DMAP (5 mg, 0.04 mmol). The solution was stirred for 12 h and the precipitate was filtered. The filtrate was concentrated to 5 mL and was poured into 200 mL hexanes/methanol (v/v 9:1). The precipitate was dried to give the copolymer **5** as yellow solid (67 mg, 59%).  $^1\text{H}$  NMR (500 MHz,  $\text{CDCl}_3$ ):  $\delta$  5.20-5.50 (-OCCH( $\text{CH}_2\text{O}$ -)O- and -OCCH( $\text{CH}_3$ )O-), 4.59 (-OCH<sub>2</sub>CH-), 2.65 (HC $\equiv$ CCH<sub>2</sub>CH<sub>2</sub>CO-), 2.65-2.50 (HC $\equiv$ CCH<sub>2</sub>CH<sub>2</sub>CO-), 2.01 (HC $\equiv$ CCH<sub>2</sub>CH<sub>2</sub>CO-), 1.60 (-CHCH<sub>3</sub>); IR (ATR): 3286 (w,  $\nu_{\text{as}}$ (alkyne C-H)), 2992 (w), 2945 (w,  $\nu_{\text{as}}$ (-CH<sub>2</sub>- and -CH<sub>3</sub>)), 1743 (vs,  $\nu_s$ (ester C=O)), 1451 (m,  $\delta_s$ (-CH<sub>2</sub>-)), 1364 (m), 1182 (s), 1131 (w), 1083 (vs), 1044 (w), 865 (w), 753 (w), 651 (m)  $\text{cm}^{-1}$ .

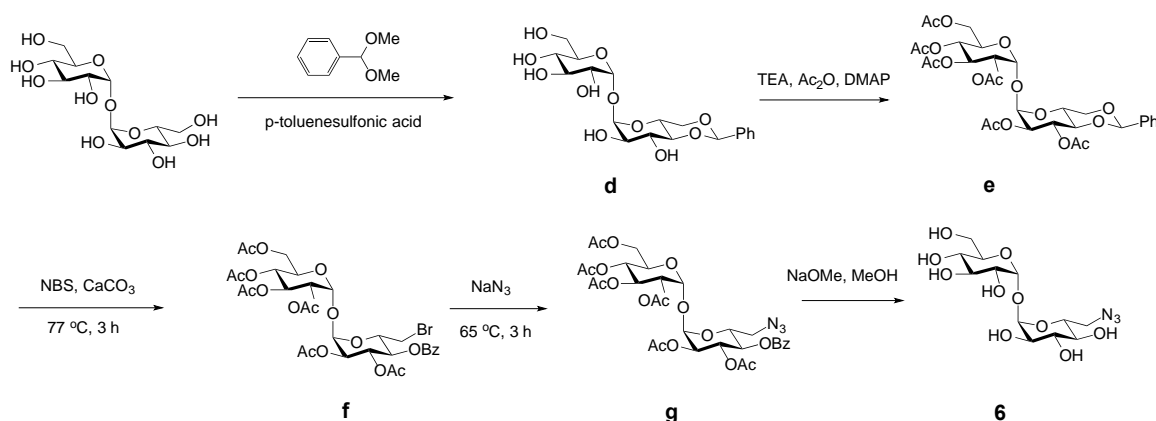

**Scheme S2.** Synthesis of 6-azido-6-deoxy- $\alpha,\alpha$ -D-trehalose (**6**).

**Synthesis of 4,6-benzylidene- $\alpha,\alpha$ -D-trehalose (d)**<sup>[2]</sup>

Benzaldehyde dimethyl acetal (1.1 g, 7.0 mmol), trehalose (2.0 g, 5.8 mmol) and *p*-toluenesulfonic acid (0.1 g, 0.58 mmol) were added to DMF (20 mL). The mixture was stirred for 12 hours at room temperature and further heated up to 40 °C for another 3 hours. The solution was used directly without purification.

**Synthesis of 4,6-benzylidene-2,2',3,3',6'-penta-*O*-acetyl- $\alpha,\alpha$ -D-trehalose (e)**<sup>[2]</sup>

Triethylamine (14.0 g, 0.14 mol), Ac<sub>2</sub>O (7.0 g, 0.70 mol) and DMAP (122 mg, 1.0 mmol) were added into the crude **d**. After stirring overnight, the reaction was transferred to a separatory funnel and brine (7 mL) was added. The crude product was extracted with ethyl acetate for three times. The organic phase was combined, washed with water/brine and concentrated under vacuum. After flash column chromatography using hexane/ethyl acetate (v/v 2:3), compound **e** was obtained as a white solid (1.2 g, 30%). <sup>1</sup>H NMR (500 MHz, CDCl<sub>3</sub>):  $\delta$  7.48 - 7.38 (m, 2H, Ar H), 7.38 - 7.30 (m, 3H, Ar H), 5.61 (t, *J* = 9.8 Hz, 1H; H-3<sub>a</sub>), 5.55 - 5.44 (m, 2H; H-3<sub>b</sub>, Ar-CH-(OCH<sub>2</sub>)(OCH)-), 5.37 (d, *J* = 3.7 Hz, 1H; H-1<sub>b</sub>), 5.27 (d, *J* = 3.7 Hz, 1H; H-1<sub>a</sub>), 5.09 - 4.93 (m, 3H; H-2<sub>a</sub>, H-2<sub>b</sub> and H-4<sub>b</sub>), 4.25 (dd, *J* = 12.1, 5.5 Hz, 1H; H-6<sub>b1</sub>), 4.17 (dd, *J* = 10.4, 4.8 Hz, 1H; H-6<sub>a1</sub>), 4.13 - 4.06 (m, 1H; H-5<sub>b</sub>), 4.06 - 3.93 (m, 2H; H-5<sub>a</sub> and H-6<sub>b1</sub>), 3.75 (t, *J* = 10.4 Hz; 1H, H-6<sub>a2</sub>), 3.69 (t, *J* = 9.6 Hz, 1H; H-4<sub>a</sub>), 2.22 - 1.96 (m, 18H; OAc); IR (ATR): 2986 (w,  $\nu_s$ (aromatic C-H)), 2950 (w,  $\nu_{as}$ (-CH<sub>2</sub>- and -CH<sub>3</sub>)), 2870(w,  $\nu_s$ (-CH<sub>2</sub>- and aliphatic -CH-)), 1741 (vs,  $\nu_s$ (ester C=O)), 1374 (m), 1214 (vs), 1133 (m), 1098 (w), 1021 (s), 980 (m), 956 (m), 906 (m), 803 (w), 767 (w), 702 (m) cm<sup>-1</sup>.

**Synthesis of 4-*O*-benzoyl-6-bromo-2,2',3,3',4',6'-penta-*O*-acetyl-6-deoxy- $\alpha,\alpha$ -D-trehalose (f)**<sup>[2]</sup>



Compound **e** (1.0 g, 1.5 mmol) was added into 50 mL of  $\text{CCl}_4$  containing NBS (285 mg, 1.6 mmol) and  $\text{CaCO}_3$  (160 mg, 1.6 mmol). The mixture was refluxed at 77 °C for 3 hours. After cooling to room temperature, the solution was washed with 10%  $\text{NaHCO}_3$  and water. The organic phase was dried over  $\text{Na}_2\text{SO}_4$ , and the filtrate was concentrated in vacuum. Purification was done by flash column chromatography using hexanes/ethyl acetate (v/v 2:3) to give compound **f** as a white solid (1.0 g, 85%).  $^1\text{H}$  NMR (500 MHz,  $\text{CDCl}_3$ ):  $\delta$  8.12 - 7.92 (d,  $J = 7.3$  Hz, 2H, Ar H), 7.60 (t,  $J = 7.3$  Hz, 1H, Ar H), 7.47 (t,  $J = 7.7$  Hz, 2H, Ar H), 5.68 (t,  $J = 9.8$  Hz, 1H; H-3<sub>a</sub>), 5.55 (t,  $J = 9.7$  Hz, 1H; H-3<sub>b</sub>), 5.36 (m, 2H; H-1<sub>a</sub>, H-1<sub>b</sub>), 5.21 - 5.18 (m, 2H; H-2<sub>b</sub> and H-4<sub>a</sub>), 5.17 - 5.00 (m, 2H; H-2<sub>a</sub> and H-4<sub>b</sub>), 4.25 (m, 2H; H-5<sub>a</sub> and H-6<sub>b1</sub>), 4.16 - 3.97 (m, 2H; H-5<sub>b</sub> and H-6<sub>b2</sub>), 3.49 - 3.25 (m, 2H; H-6<sub>a1</sub> and H-6<sub>a2</sub>), 2.28 - 1.76 (m, 18H; OAc); IR (ATR): 2985 (w,  $\nu_s$ (aromatic C-H)), 2950 (w,  $\nu_{\text{as}}$ (-CH<sub>2</sub>- and -CH<sub>3</sub>)), 2872 (w,  $\nu_s$ (-CH<sub>2</sub>- and aliphatic -CH-)), 1741 (vs,  $\nu_s$ (ester C=O)), 1374 (m), 1214 (vs), 1133 (m), 1098 (w), 1037 (s), 980 (m), 958 (m), 907 (m), 803 (w), 767 (m), 702 (m), 652 (m), 604 (m)  $\text{cm}^{-1}$ .

**Synthesis of 4-O-benzoyl-6-azido-2,2',3,3',4',6'-penta-O-acetyl-6-deoxy- $\alpha,\alpha$ -D-trehalose (**g**)<sup>[2]</sup>**

A solution of compound **f** (1.0 g, 1.2 mmol) and  $\text{NaN}_3$  (150 mg, 3 mmol) in DMF (10 mL) was heated under Ar at 65 °C for 3 h. After cooling to room temperature, the insoluble material was filtered. 100 mL of  $\text{CH}_2\text{Cl}_2$  was added into the filtrate, and the mixture was washed with water and brine. The organic layer was dried over  $\text{Na}_2\text{SO}_4$ . The filtered solution was concentrated under reduced pressure to yield compound **g** as a white solid (0.70 g, 82%).  $^1\text{H}$  NMR (500 MHz,  $\text{CDCl}_3$ )  $^1\text{H}$  NMR (500 MHz,  $\text{CDCl}_3$ )  $\delta$  8.01 (d,  $J = 8.2$  Hz, 2H, Ar H), 7.60 (t,  $J = 7.3$  Hz, 1H, Ar H), 7.47 (t,  $J = 7.6$  Hz, 2H, Ar H), 5.68 (t,  $J = 9.8$  Hz, 1H; H-3<sub>a</sub>), 5.55 (t,  $J = 9.8$  Hz, 1H; H-3<sub>b</sub>), 5.36 (m, 2H; H-1<sub>a</sub> and H-1<sub>b</sub>), 5.22 (t,  $J = 9.8$  Hz, 1H; H-4<sub>a</sub>), 5.17 - 5.00 (m, 3H; H-2<sub>a</sub>, H-2<sub>b</sub> and H-5<sub>b</sub>), 4.25 (dd,  $J = 12.1, 5.6$  Hz, 1H; H-6<sub>b1</sub>), 4.20 - 4.06 (m, 2H; H-5<sub>a</sub> and H-5<sub>b</sub>), 4.03 (d,  $J = 12.1$  Hz, 1H; H-6<sub>b2</sub>), 3.44 (dd,  $J = 13.4, 7.6$  Hz, 1H; H-

6<sub>a1</sub>), 3.20 (dd,  $J = 13.1, 1.7$  Hz, 1H; H-6<sub>a2</sub>), 2.88 - 1.76 (m, 18H; OAc). IR (ATR): 2960 (w,  $\nu_{\text{as}}(-\text{CH}_2-$  and  $-\text{CH}_3)$ ), 2104 (m,  $\nu_{\text{as}}(-\text{N}_3)$ ), 1746 (vs,  $\nu_{\text{s}}(\text{ester C=O})$ ), 1367 (m), 1211 (vs), 1135 (w), 1065 (w), 1018 (s), 982 (w), 897 (m), 802 (w), 754 (w), 712 (m)  $\text{cm}^{-1}$ .

### Synthesis of 6-azido-6-deoxy- $\alpha,\alpha$ -D-trehalose (**6**)<sup>[2]</sup>

Compound **g** (1.00 g, 1.3 mmol) and NaOMe (15 mg, 0.27 mmol) were added to methanol (20 mL). After stirring for 1 hour, the mixture was neutralized with Amberlite IRC-120 H<sup>+</sup> resins and filtered. After removing the solvent, the crude was purified by chromatography on silica gel using water/isopropanol/ethyl acetate (v/v/v 1:4:4) to give compound **6** as a white powder (239 mg, 50%). <sup>1</sup>H NMR (500 MHz, D<sub>2</sub>O):  $\delta$  5.24 (m, 2H; H-1<sub>a</sub> and H-1<sub>b</sub>), 4.06-3.98 (m, 1H; H-5<sub>a</sub>), 3.89 (m, 4H; H-5<sub>b</sub>, H-3<sub>a</sub>, H-3<sub>b</sub> and H-6<sub>b1</sub>), 3.82 (dd,  $J=11.4, 4.0$  Hz, 1H; H-6<sub>b2</sub>), 3.77-3.66 (m, 3H; H-2<sub>a</sub>, H-2<sub>b</sub> and H-6<sub>a1</sub>), 3.61 (dd,  $J=13.3, 5.5$  Hz, 1H; H-6<sub>a2</sub>), 3.56-3.45 (m, 2H; H-4<sub>a</sub> and H-4<sub>b</sub>); IR (ATR): 3287 (s,  $\nu_{\text{s}}(\text{alcoholic O-H})$ ), 2928 (m,  $\nu_{\text{as}}(-\text{CH}_2-)$ ), 2101 (s,  $\nu_{\text{as}}(-\text{N}_3)$ ), 1651 (w), 1435 (w), 1282 (m), 1146 (w), 1101 (w), 1073 (w), 984 (vs), 941 (w), 840 (w), 803 (w)  $\text{cm}^{-1}$ .

### Synthesis of glycopolymer **7**

6-Azido-6-deoxy- $\alpha,\alpha$ -D-trehalose **6** (50 mg, 1.3 mmol) and copolymer **5** (50 mg) were dissolved in DMSO (5 mL), and the solution was bubbled with Ar for 1 h. CuBr (3 mg) and pentamethyldiethylenetriamine (10  $\mu\text{L}$ ) were added, and the solution was bubbled with Ar for another hour. After the reaction was completed, the mixture was poured into a dialysis membrane (molecule weight cutoff: 3500), and was dialyzed against water for two days. Polymer **7** was obtained as a light yellow powder after lyophilization (57 mg, 76%). <sup>1</sup>H NMR (500 MHz, DMSO-*d*<sub>6</sub>):  $\delta$  7.77 (triazole), 5.20 ( $-\text{OCCH}(\text{CH}_2\text{O})-\text{O}-$  and  $-\text{OCCH}(\text{CH}_3)\text{O}-$ ), 3.00-6.00 (trehalose and  $-\text{OCH}_2\text{CH}-$ ), 2.95-2.60 ( $\text{HC}\equiv\text{CCH}_2\text{CH}_2\text{CO}-$ ), 1.46 ( $-\text{CHCH}_3$ ); IR (ATR): 3328 (w,  $\nu_{\text{s}}(\text{alcoholic O-H})$ ), 2995 (w), 2945 (w,  $\nu_{\text{as}}(-\text{CH}_2-$  and  $-\text{CH}_3)$ ), 2880 (w,  $\nu_{\text{s}}(-\text{CH}_2-$  and

aliphatic -CH-), 1747 (vs,  $\nu_s(\text{ester C=O})$ ), 1451(m,  $\delta_s(-\text{CH}_2-)$ ), 1380 (w), 1361 (w), 1183 (s), 1081 (vs), 864 (m), 751 (m)  $\text{cm}^{-1}$ .

### Calculation of the trehalose content in polymer 7

The trehalose content (percent weight) in polymer 7 was calculated using the following equation:

$$\begin{aligned} \text{Trehalose (wt\%)} &= \frac{\text{Mw(A)}}{\text{Mw(B)} + \text{Mw(C)} \times (\text{n/m})} \times 100\% \\ &= \frac{325}{537 + 72 \times (7/1)} \times 100\% = 31\% \end{aligned}$$

Mw(A): 325, molecular weight of the coupled trehalose, excluding the triazole

Mw(B): 537, molecular weight of the trehalose-coupled repeating unit

Mw(C): 72, molecular weight of the unfunctionalized repeating unit

n/m=7, obtained from the ratio of the integrals at 1.6 ppm ( $-\text{CH}_3$ ) and 4.6 ppm ( $\text{PhCH}_2\text{O}-$ ) in polymer 3.

### Synthesis of SPIONs (superparamagnetic iron oxide nanoparticles)

SPIONs were synthesized followed a previous procedure.<sup>[31]</sup> Under Argon protection, iron (III) acetylacetonate (0.35 g, 1.0 mmol) was added into a mixture of 1,2-hexadecanediol (1.8 g, 5.0 mmol), oleic acid (1.2 mL, 3.0 mmol) and oleylamine (1.4 mL). The reaction mixture was heated to 200 °C for 2 hours and maintain at 280 °C for another hour. Ethanol was added once the reaction was cooled to room temperature. A black solid was collected after centrifugation at 7000 rpm for 10 min, which was further washed with ethanol to remove excess reagents. Finally, the nanoparticles were redispersed in THF and stored at room temperature.

### SPIONs encapsulation

The dispersion of the SPIONs in THF (1 mL, 2 mg/mL) was added dropwise into a solution of polymer **7** (5 mL, 1 mg/mL) in water/DMSO (v/v 1:1) under vortex. The mixture was stirred overnight, and was then dialyzed against water. Large aggregates were removed by centrifugation at 3000 rpm for 5 mins and the supernatant containing the magnetic micelles was collected.

### **Binding of magnetic micelles with lectin**

The magnetic micelles (100  $\mu$ L, 0.25 mg/mL) were added to a solution of Con A (100  $\mu$ L, 0.1 mg/mL) containing 1.0 mM of  $MnCl_2$  and  $CaCl_2$  in pH 7.4 PBS buffer, or BSA (0.1 mg/mL) in pH 7.4 PBS buffer, or pH 7.4 PBS only. Aliquots were taken out at different time intervals and were measured by DLS.

### **Binding of magnetic micelles with bacteria**

*M. smegmatis* mc<sup>2</sup> 155, *S. epidermidis* 35984 or *E. coli* ORN 208 were inoculated in enriched Middlebrook 7H9 medium, LB medium or tryptic soy broth, respectively, at 37 °C and 250 rpm until OD reached 0.3 (OD<sub>600</sub> for *M. smegmatis* mc<sup>2</sup> 155, OD<sub>625</sub> for *S. epidermidis* 35984 and *E. coli* ORN 208). Then, the bacteria (3 mL) were collected by centrifuging at 5000 rpm for 3 mins and then redispersed in PBS (3 mL). The bacteria (200  $\mu$ L, 10<sup>8</sup> CFU/mL) was transferred into a glass vial and magnetic micelles (200  $\mu$ L, 0.25 mg/mL) was added. The mixture was incubated at 37 °C overnight. Aliquots (10  $\mu$ L) were transferred to chamber slides and the microscopy images were taken.

To prepare TEM samples, the mixture was centrifuged at 5000 rpm for 5 min and the precipitates were redispersed in water. The suspension was dropped onto a 200-mesh Cu grid and dried under vacuum.

### **Mycobacteria detection**

Similar procedures as in bacteria binding study were followed, in which, 200  $\mu\text{L}$  of *M. smegmatis* mc<sup>2</sup> 155 ( $10^3$ ,  $10^4$ ,  $10^6$  and  $10^8$  CFU/mL) was incubated with magnetic micelles (200  $\mu\text{L}$ , 0.25 mg/mL) at 37 °C and 250 rpm for 24 hours.

### **Bacterial viability tests**

*M. smegmatis* mc<sup>2</sup> 155, *S. epidermidis* 35984 or *E. coli* ORN 208 (100  $\mu\text{L}$ ,  $10^6$  CFU/mL) in the culture medium was incubated with magnetic micelles (100  $\mu\text{L}$ , 0.25 mg/mL) for 24 hours at 37 °C and 250 rpm in a 96 well plate. 50  $\mu\text{L}$  of AlamarBlue was added to each well, and the plate was incubated for another hour at 37 °C. The fluorescence intensity was then measured at 590 nm emission wavelength (560 nm excitation).

### **Characterization**

Proton nuclear magnetic resonance ( $^1\text{H}$  NMR/ $^1\text{H}$ - $^1\text{H}$  COSY) spectra were recorded on a Bruker 500 MHz spectrometer using deuterated solvent  $\text{CDCl}_3$ ,  $\text{D}_2\text{O}$  or  $\text{DMSO-d}_6$  (Cambridge Isotope Lab., Inc.). Glycopolymers were characterized on a GPC system (Polymer Labs GPC-50 with Agilent PLgel Guard column 50 x 7.5 mm/Agilent PLgel Mixed-D 300 x 7.5 mm column/Agilent PLgel Mixed-C 300 x 7.5 mm column and Wyatt Technologies Multi Angel Light Scattering (MALLS) running DMF with 0.01 M LiCl at 1 mL/min). Molecular weight was calculated based on PMMA as the standard calibration. FT-IR spectra were recorded on a Nicolet 6700 FT-IR spectrometer. TEM images were taken on Philips EM400T. Hydrodynamic diameters and zeta potential were measured on a DLS system (Delsa<sup>TM</sup> Nano HC, Beckman). Optical images were taken on a ZEISS Primovert microscope with an AxioCam ERc 5s digital camera.

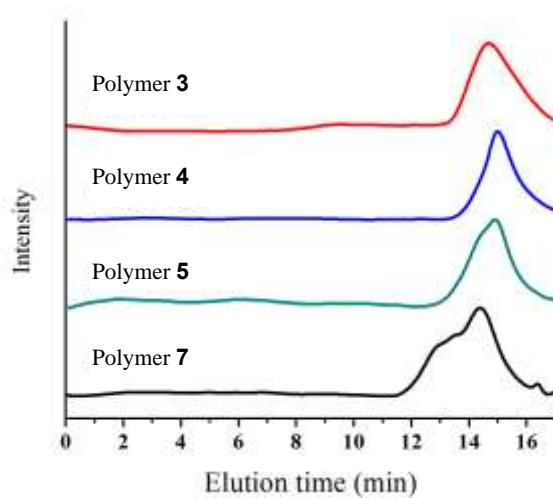

**Figure S1.** GPC chromatograms of polymers in DMF.

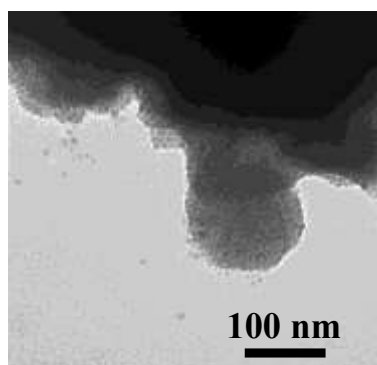

**Figure S2.** TEM image of oleic acid-coated iron oxide nanoparticles in water.

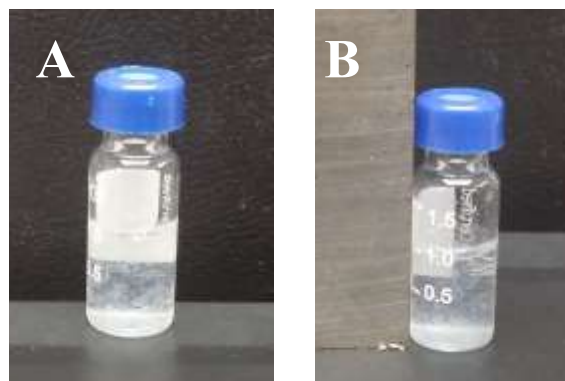

**Figure S3.** Con A-treated glycopolymer micelle solution in water before (A) and after (B) applying a magnet.

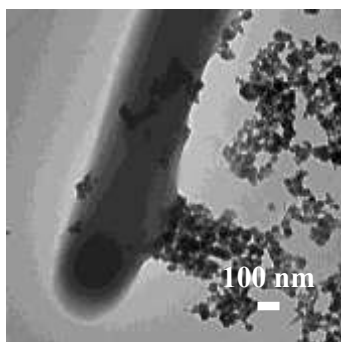

**Figure S4.** TEM image of *M. smegmatis* mc<sup>2</sup> 155 after treating with magnetic glycomicelles. Membrane deformation can be seen.

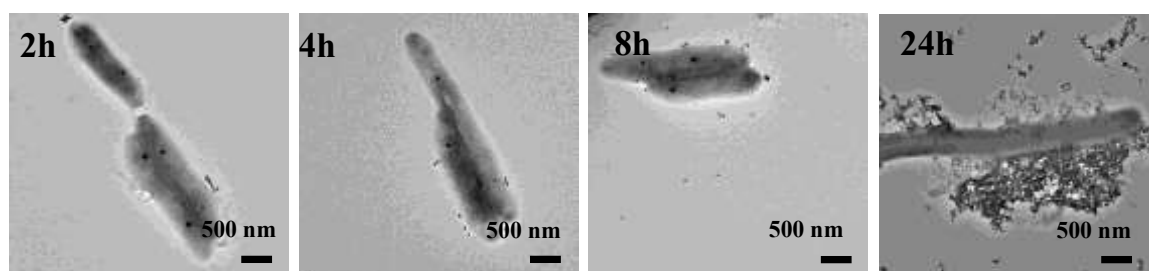

**Figure S5.** TEM images of *M. smegmatis* mc<sup>2</sup> 155 incubated with magnetic micelles for 2 h, 4 h, 8 h and 24 h.

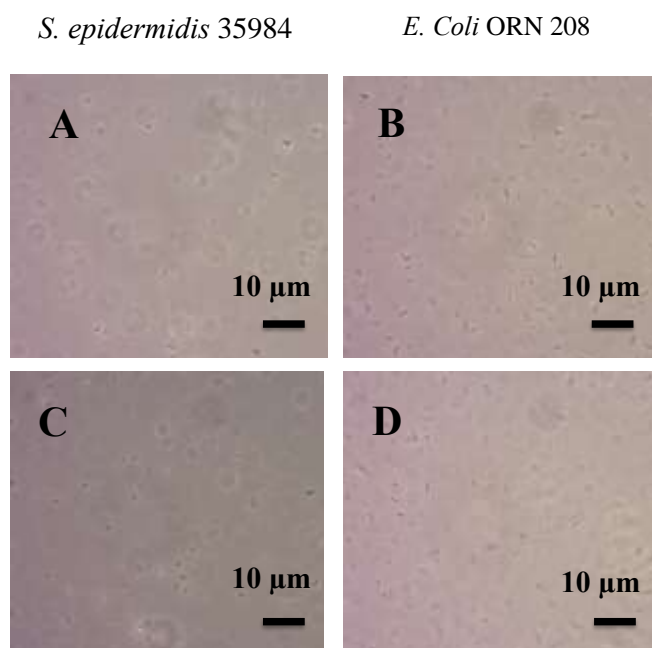

**Figure S6.** Optical images of magnetic glycomicelles treated with *S. epidermidis* 35984 or *E. Coli* ORN 208 before (A and B) and after (C and D) placing a magnet to the left of the samples.

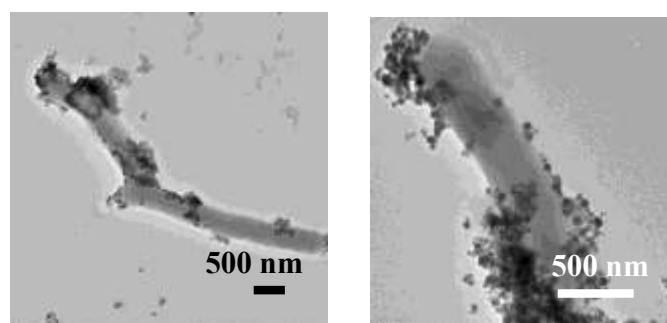

**Figure S7.** TEM image of *M. Smegmatis* mc<sup>2</sup> 155 (10<sup>4</sup> CFU/mL) after treating with magnetic micelles for 24 hours.

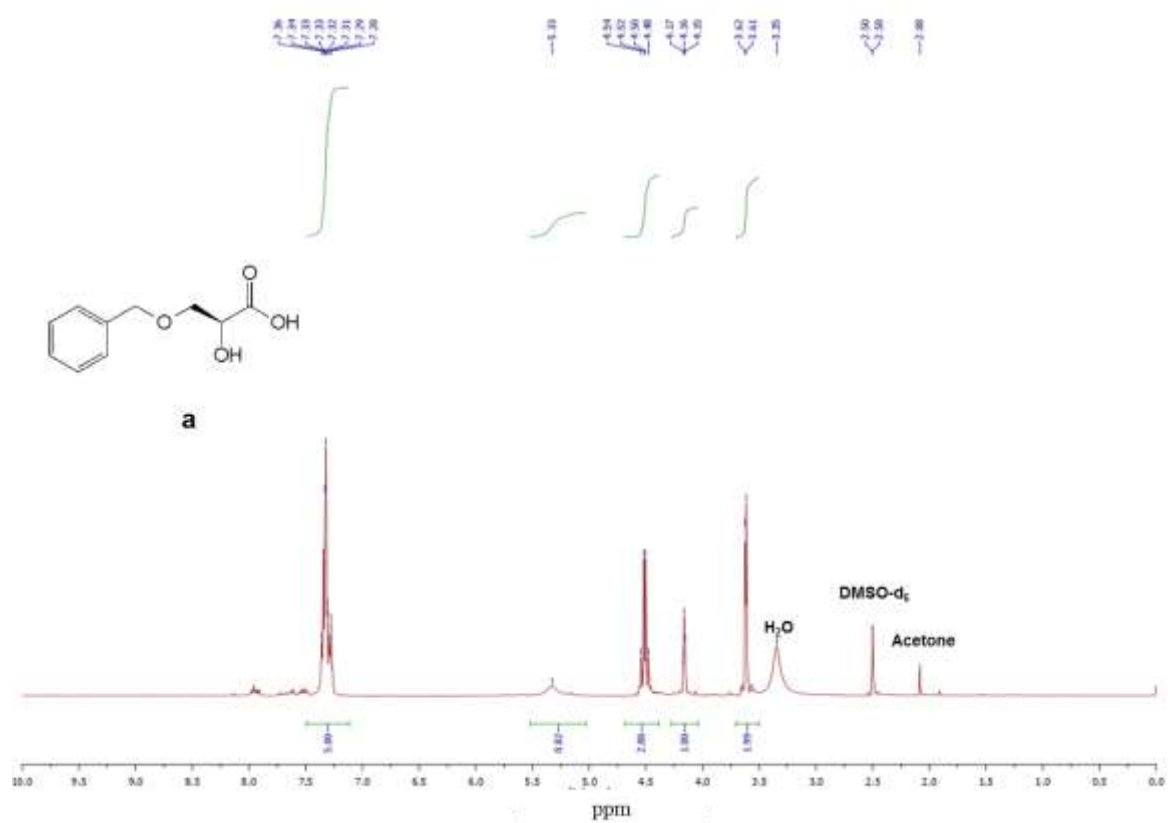

**Figure S8.** <sup>1</sup>H NMR spectrum of compound **a** in DMSO-d<sub>6</sub>.



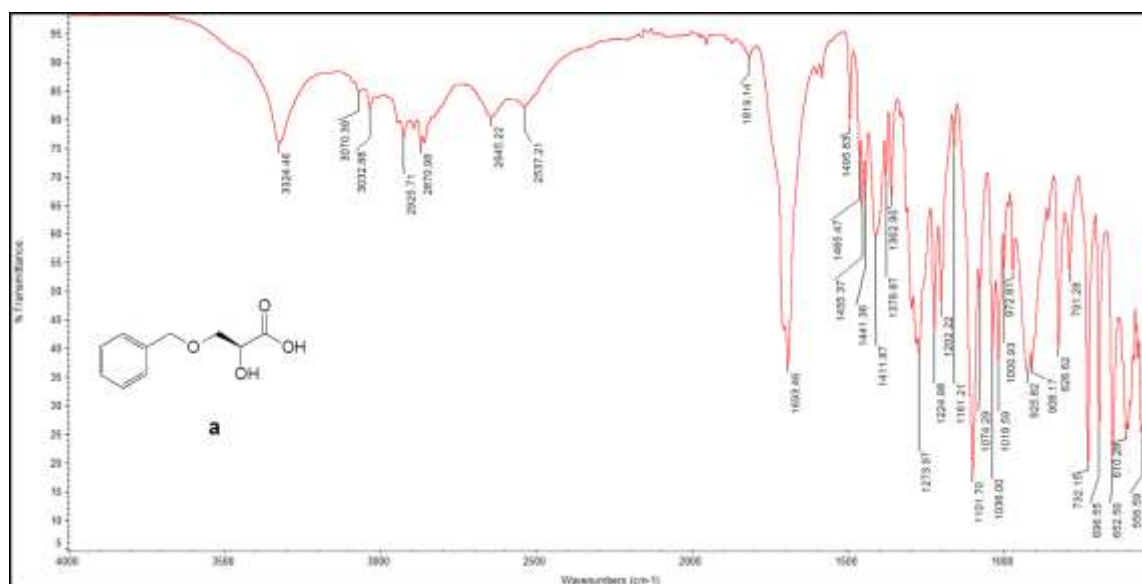

Figure S9. FT-IR spectrum of compound **a**.

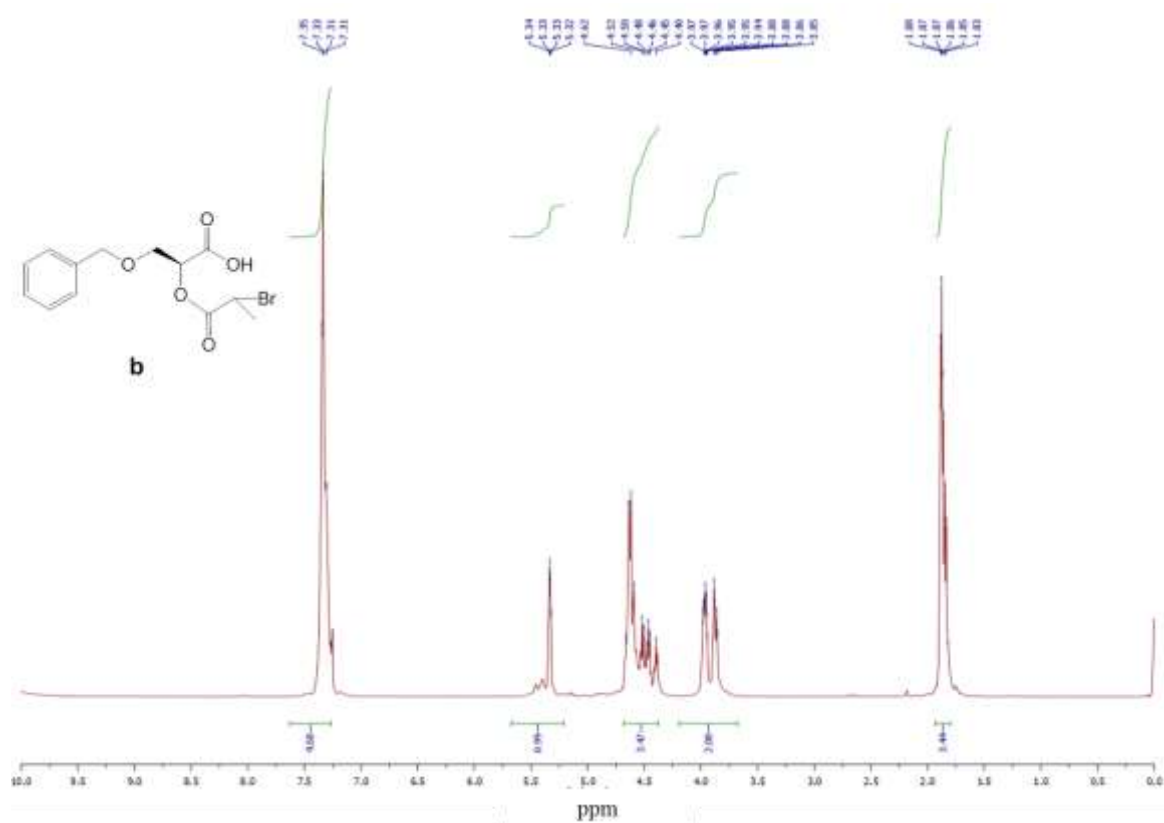

Figure S10.  $^1\text{H}$  NMR spectrum of compound **b** in  $\text{CDCl}_3$ .

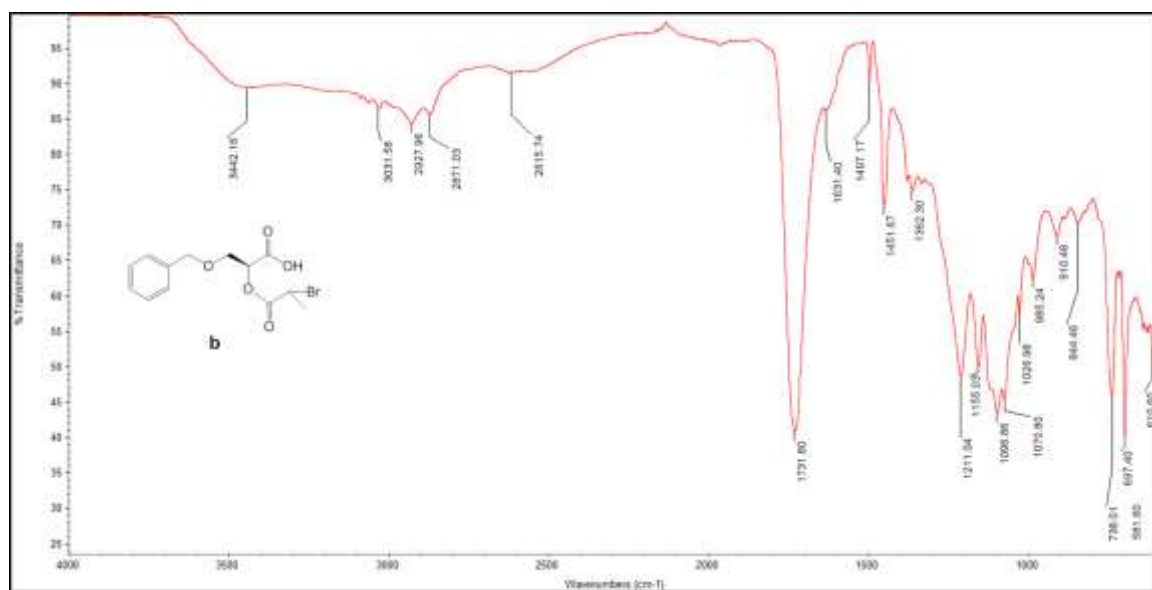

Figure S11. FT-IR spectrum of compound **b**.

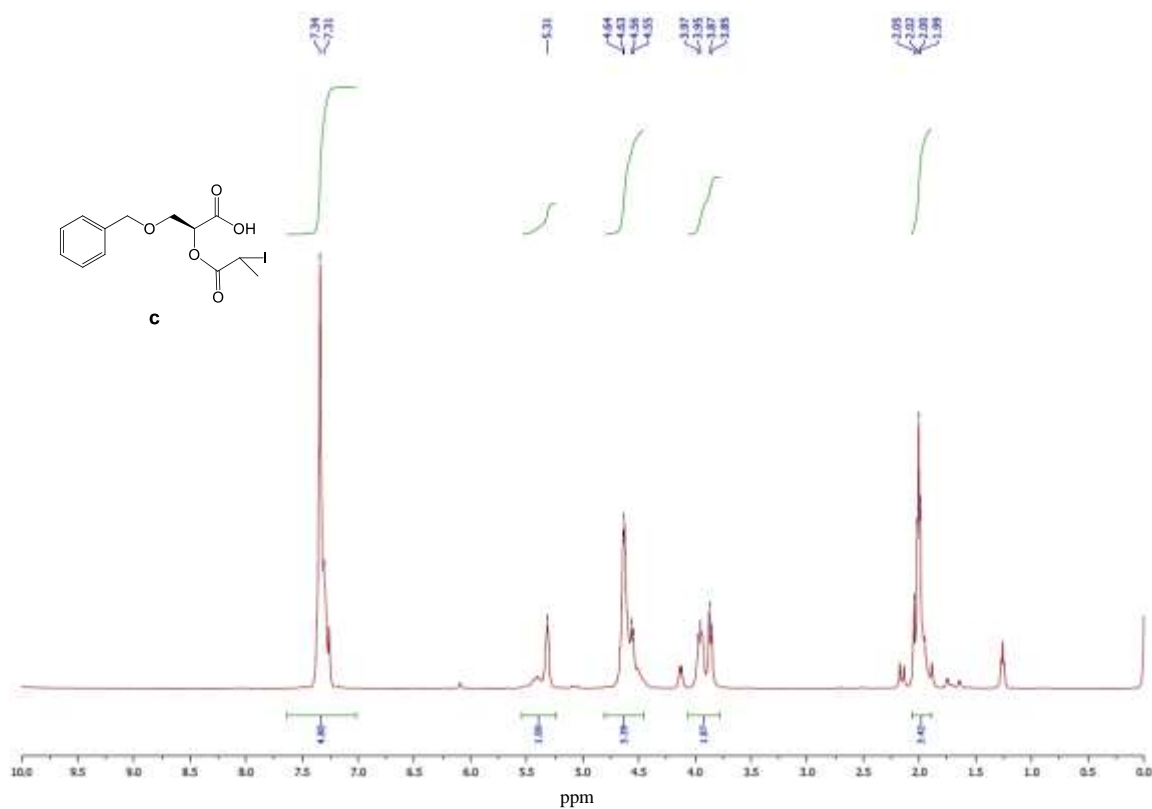

Figure S12. <sup>1</sup>H NMR spectrum of compound **c** in CDCl<sub>3</sub>.

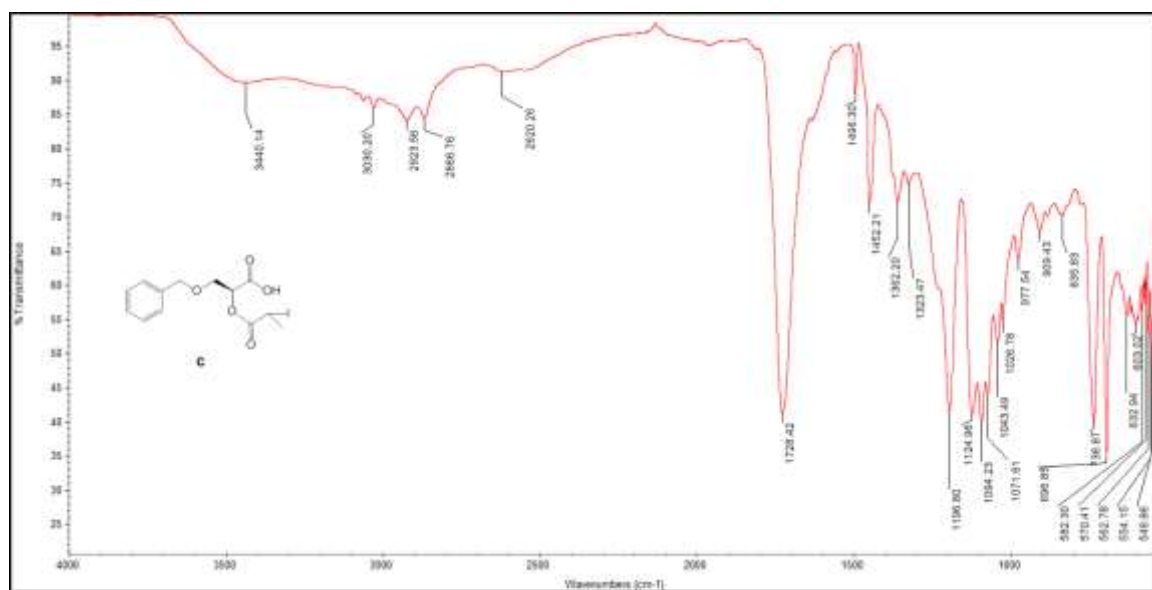

Figure S13. FT-IR spectrum of compound **c**.

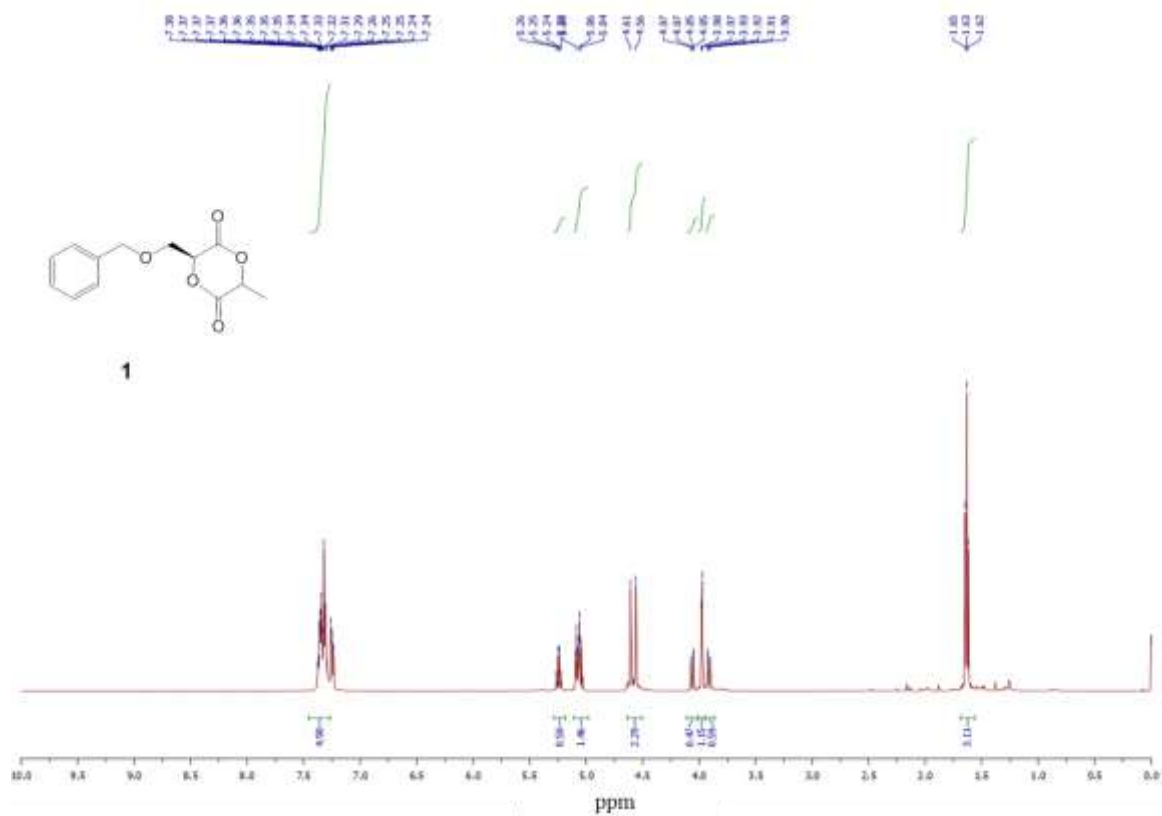

Figure S14.  $^1\text{H}$  NMR spectrum of compound **1** in  $\text{CDCl}_3$ .

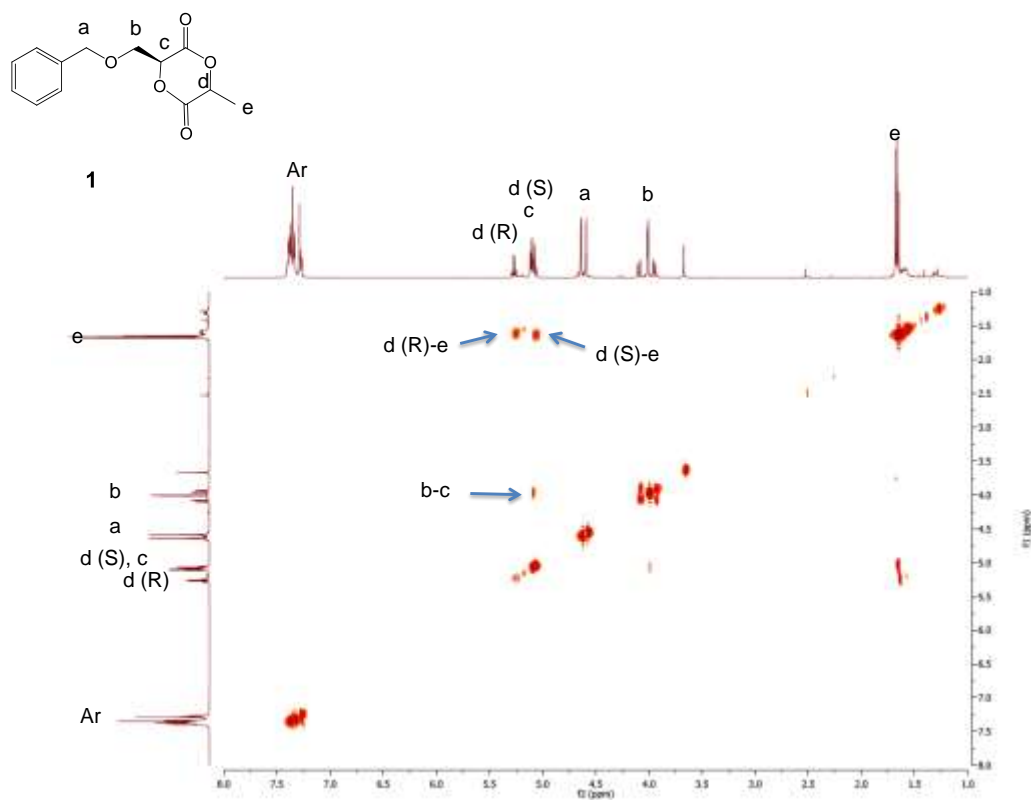

**Figure S15.**  $^1\text{H}$ - $^1\text{H}$  COSY NMR spectrum of compound **1** in  $\text{CDCl}_3$ . The stereochemistry assignment of Hd is based on data reported in the literature.<sup>[1]</sup>

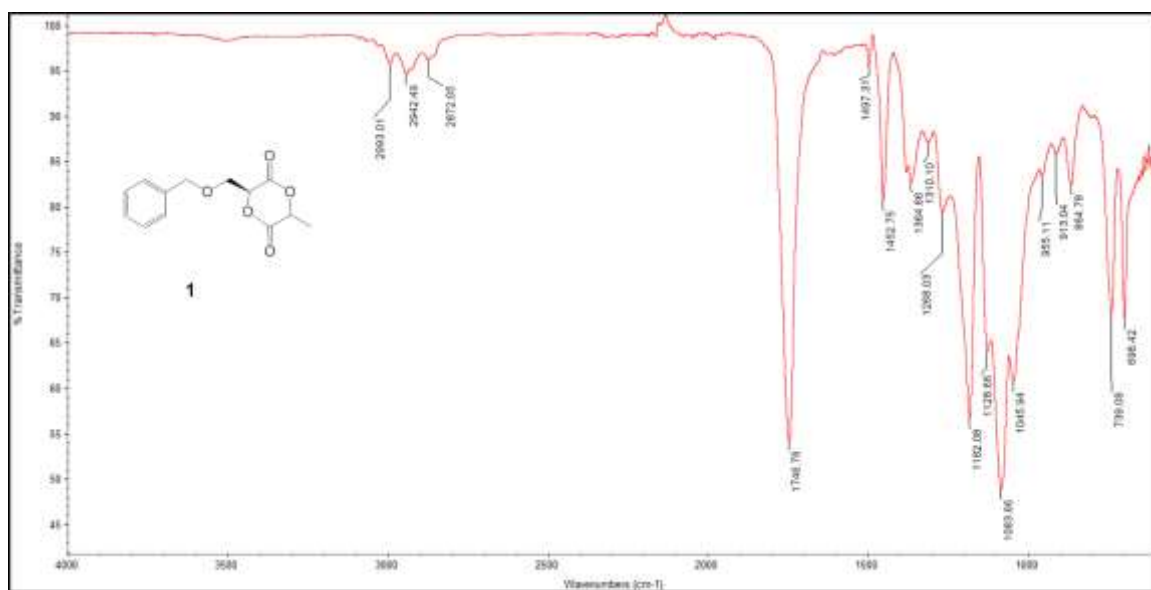

**Figure S16.** FT-IR spectrum of compound **1**.

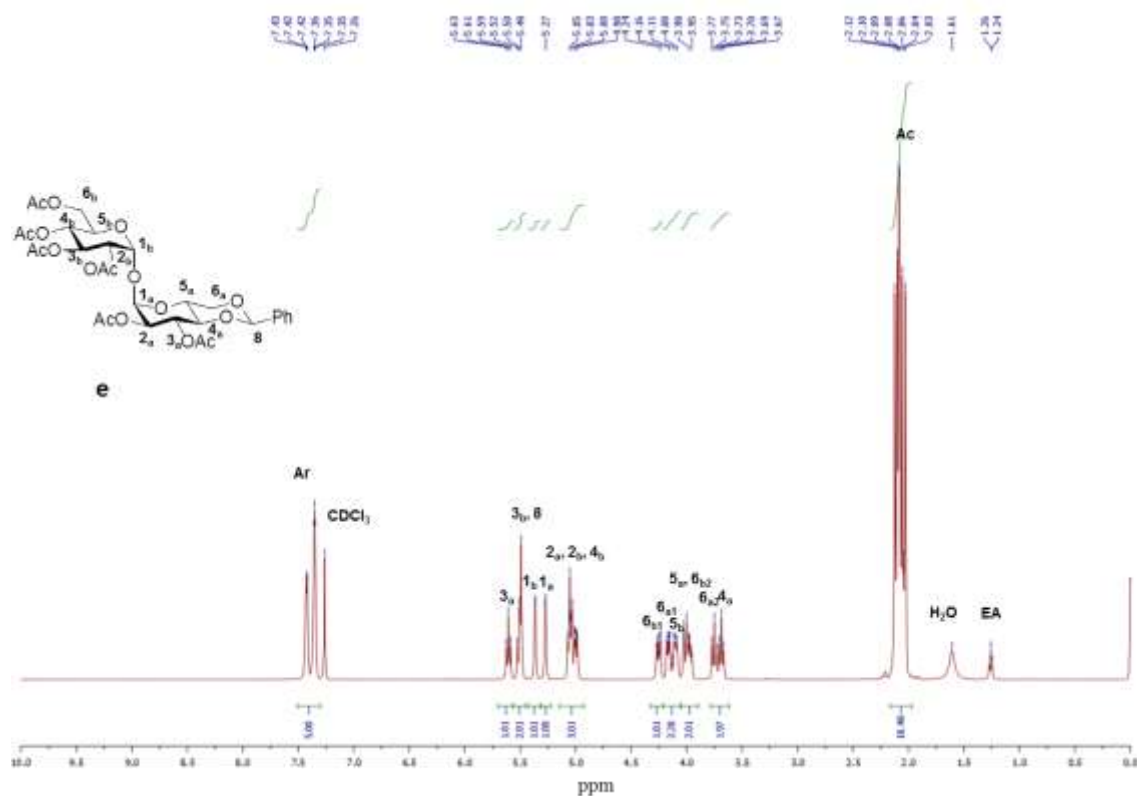

Figure S17.  $^1\text{H}$  NMR spectrum of compound **e** in  $\text{CDCl}_3$ .

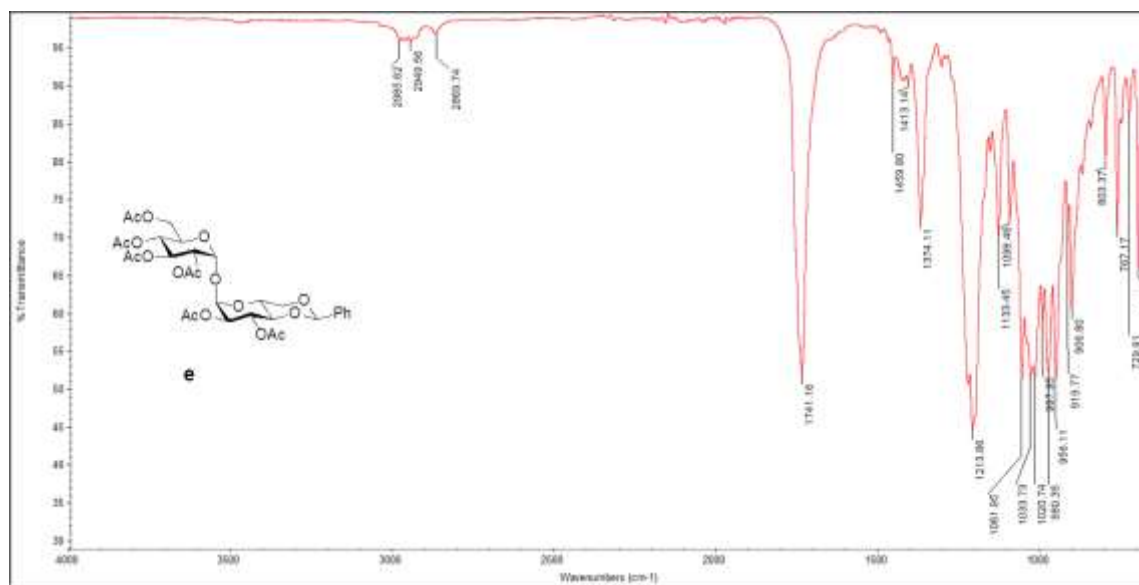

Figure S18. FT-IR spectrum of compound **e**.

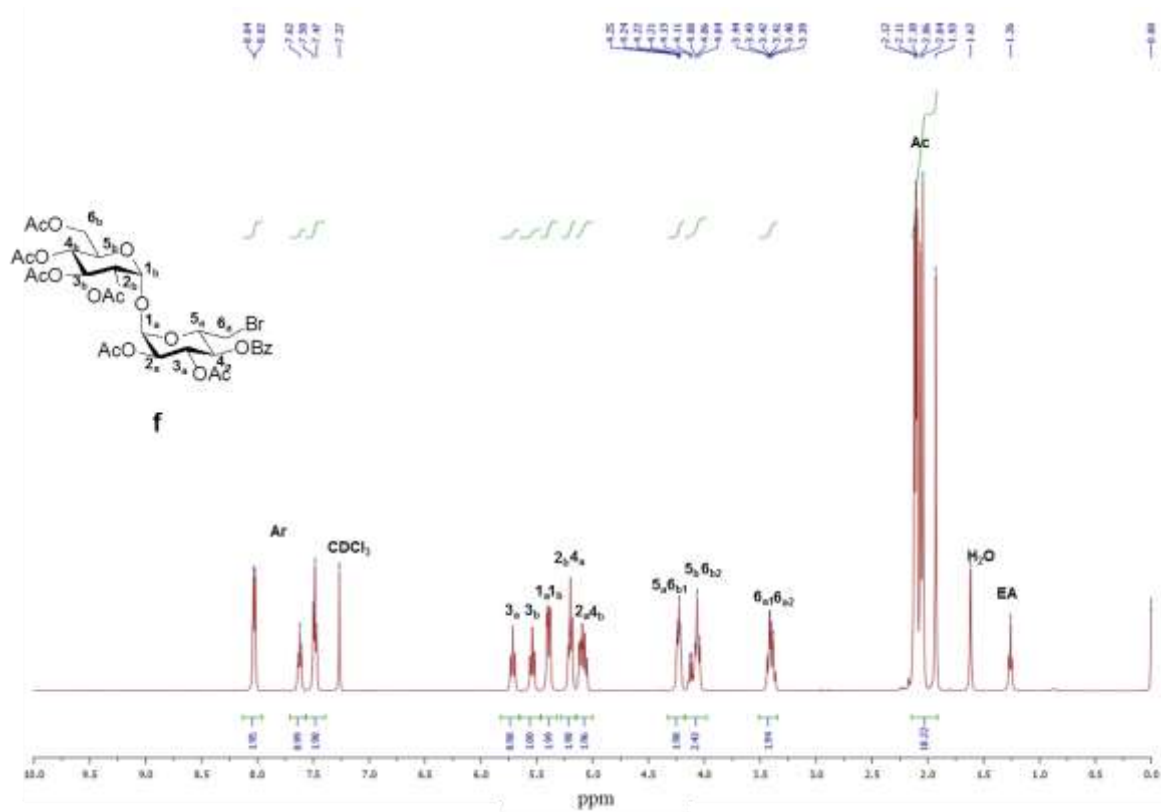

**Figure S19.** <sup>1</sup>H NMR spectrum of compound **f** in CDCl<sub>3</sub>.

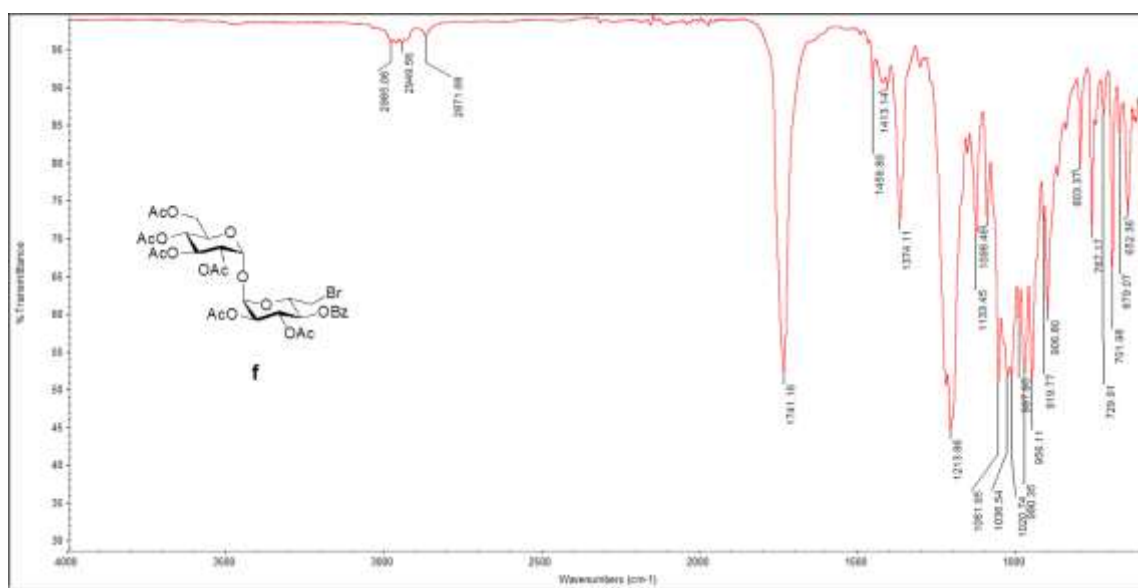

**Figure S20.** FT-IR spectrum of compound **f**.

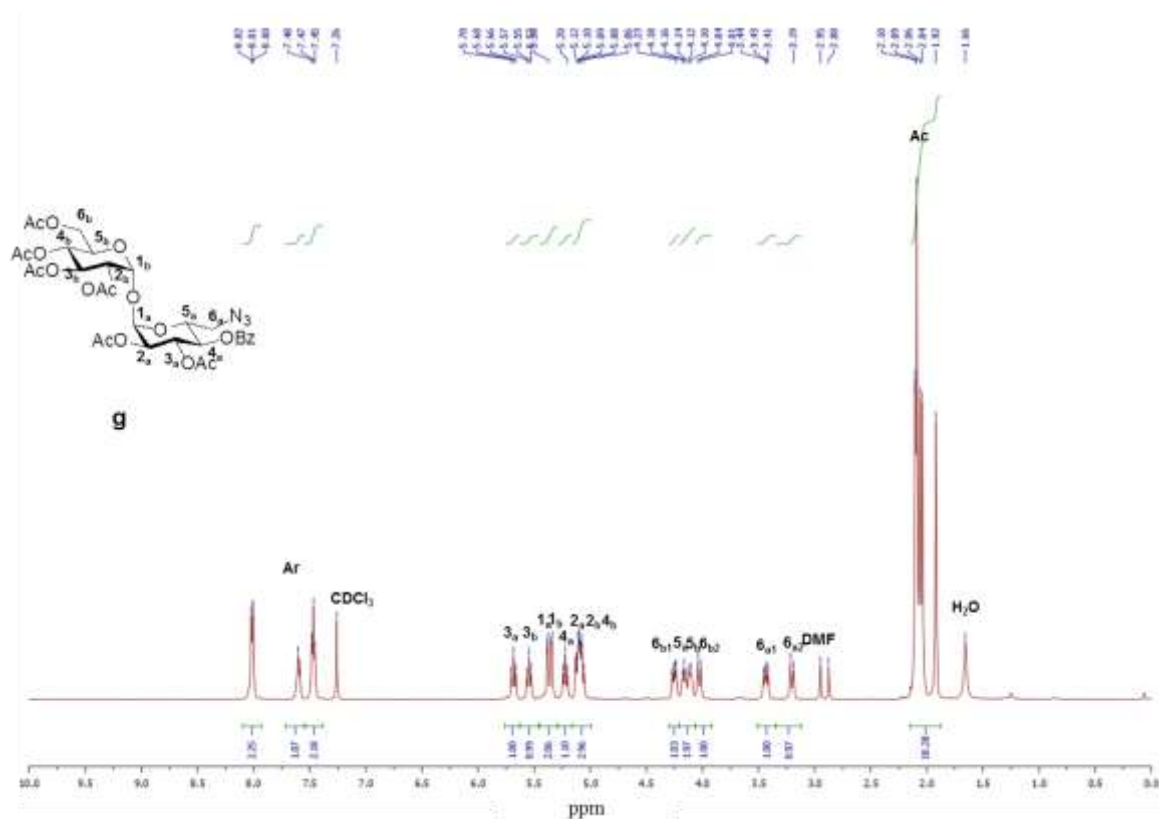

**Figure S21.** <sup>1</sup>H NMR spectrum of compound **g** in CDCl<sub>3</sub>.

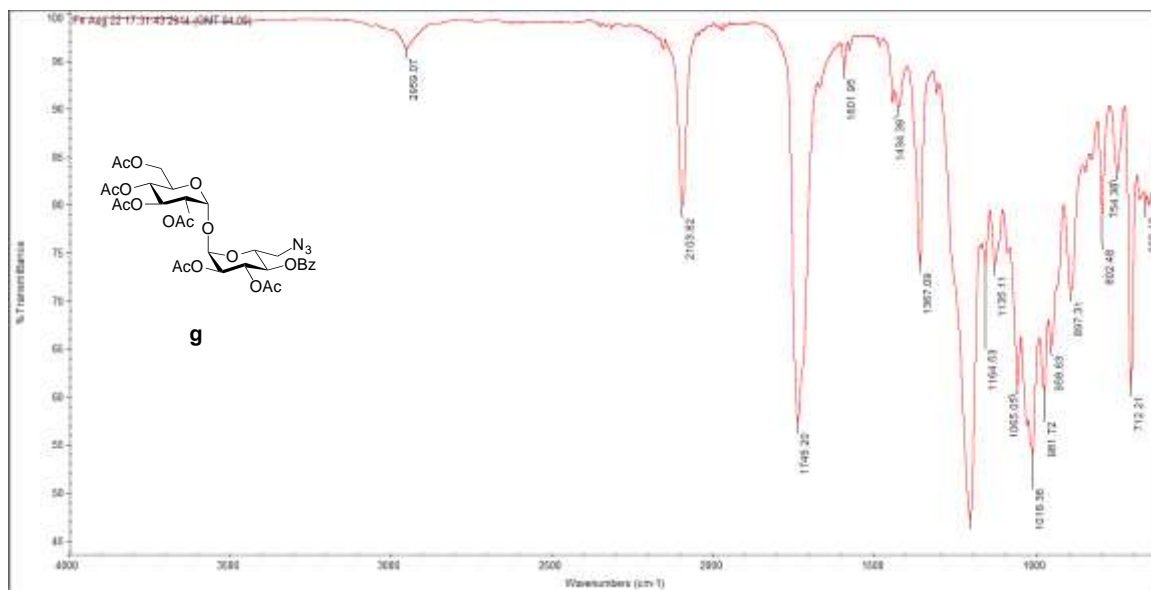

**Figure S22.** FT-IR spectrum of compound **g**.

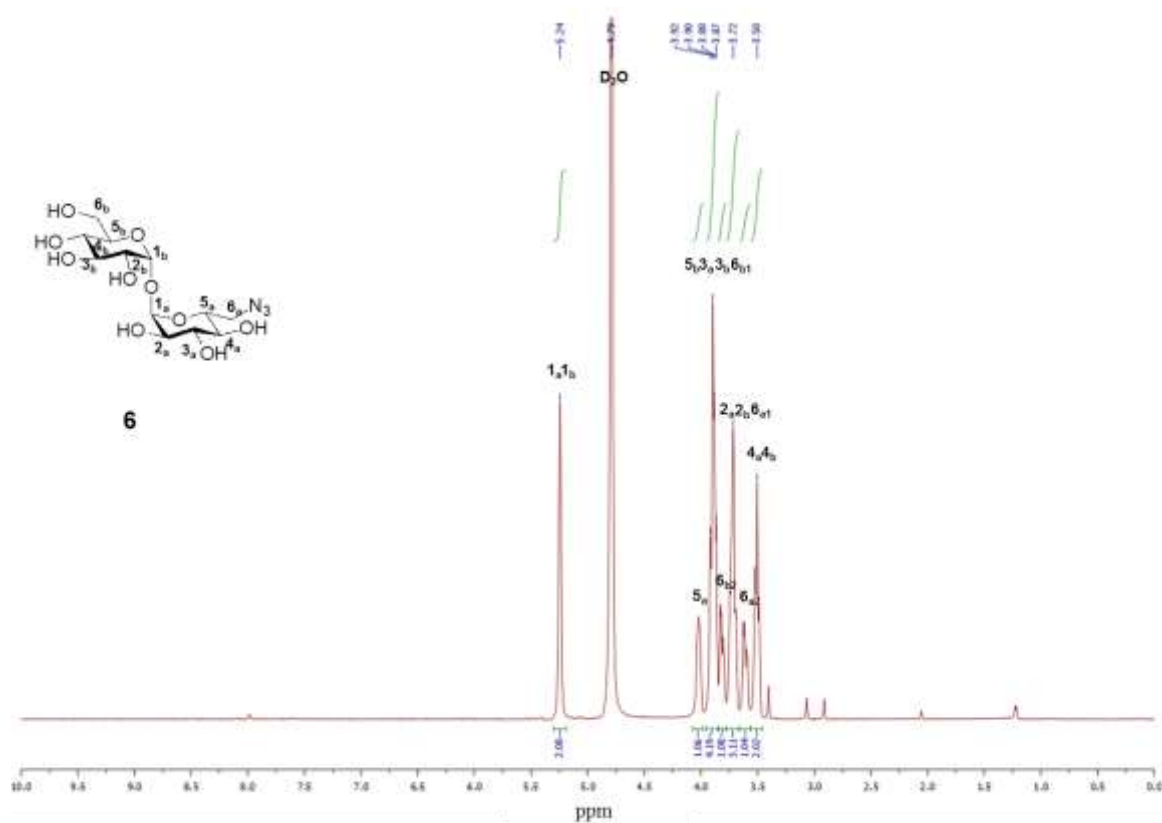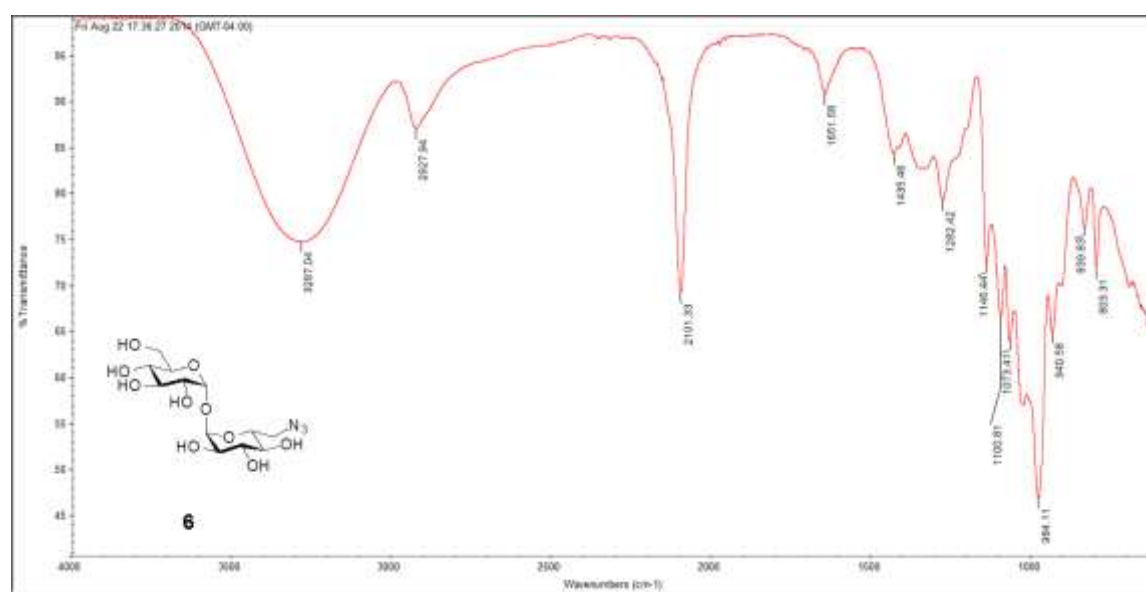



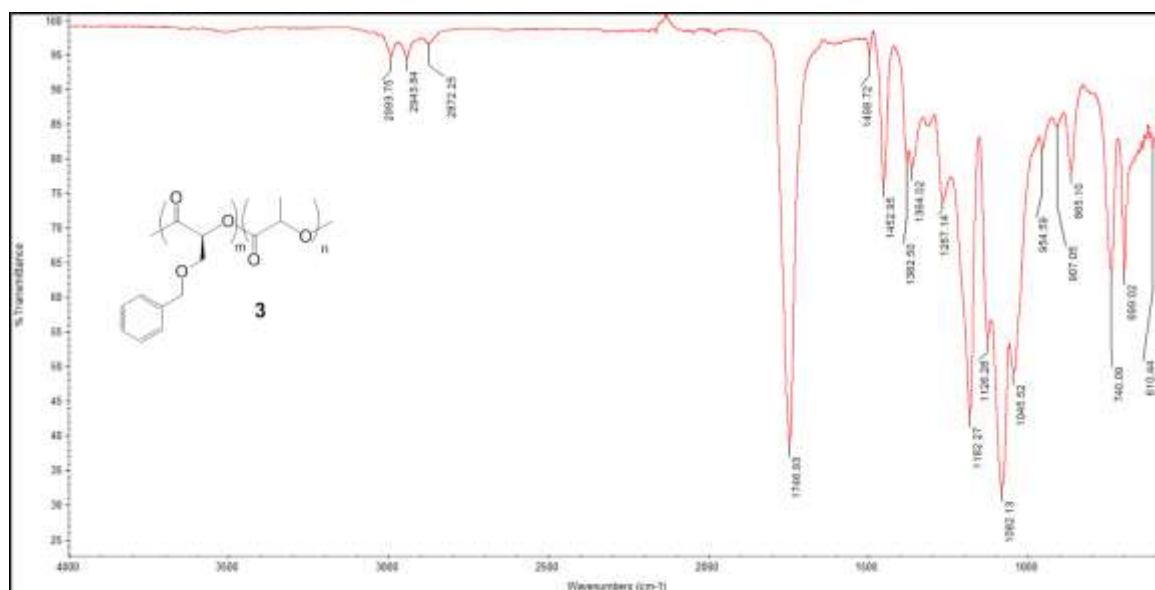

Figure S25. FT-IR spectrum of copolymer 3.

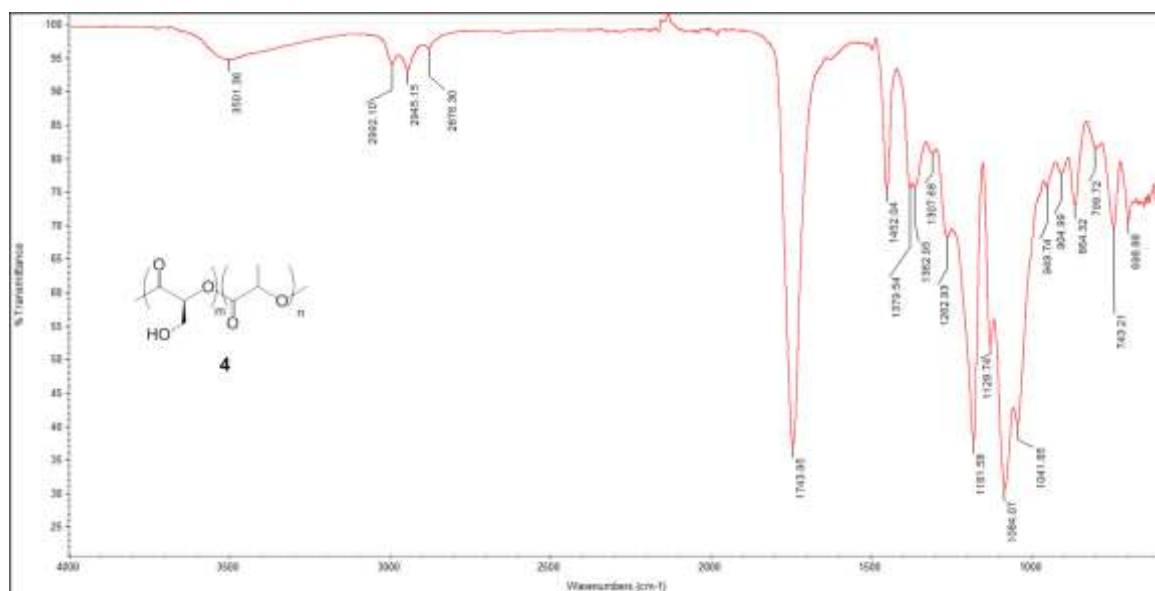

Figure S26. FT-IR spectrum of copolymer 4.

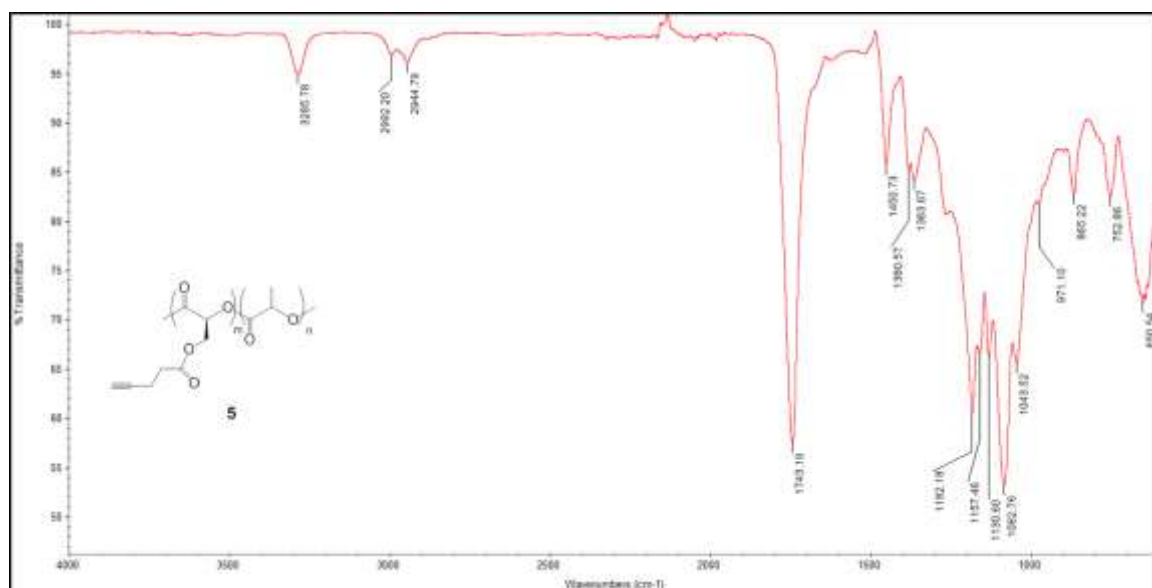

**Figure S27.** FT-IR spectrum of copolymer **5**.

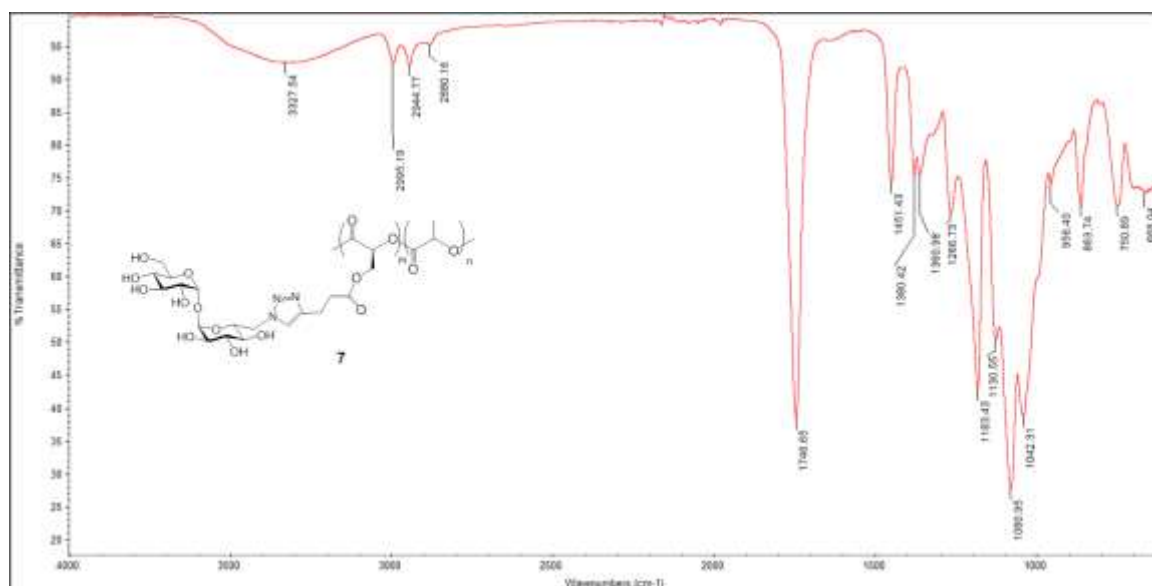

**Figure S28.** FT-IR spectrum of glycopolymer **7**.

**Table S1.** Bacterial viability test results. Fluorescent intensity of Alamar Blue-treated bacteria solution with and without incubating with magnetic micelles for 24 hours.

|                                                                   | Fluorescence intensity | Percent viability |
|-------------------------------------------------------------------|------------------------|-------------------|
| <i>M. smegmatis</i> mc <sup>2</sup> 155<br>Control                | 15943 ± 176            | 100.0 ± 1.1%      |
| <i>M. smegmatis</i> mc <sup>2</sup> 155<br>with magnetic micelles | 14736 ± 527            | 92.4 ± 3.3%       |
| <i>S. epidermidis</i> 35984<br>Control                            | 21196 ± 502            | 100.0 ± 2.4%      |
| <i>S. epidermidis</i> 35984<br>with magnetic micelles             | 20105 ± 895            | 94.9 ± 4.2%       |
| <i>E. coli</i> ORN 208<br>Control                                 | 21695 ± 26             | 100.0 ± 0.1%      |
| <i>E. coli</i> ORN 208<br>with magnetic micelles                  | 20715 ± 136            | 95.0 ± 0.7%       |

**References**

- [1] W. W. Gerhardt, D. E. Noga, K. I. Hardcastle, A. J. García, D. M. Collard, M. Weck, *Biomacromolecules* 2006, 7, 1735.
- [2] a) A. C. Richardson, E. Tarelli, *J. Chem. Soc. C* 1971, 3733; b) K. M. Backus, H. I. Boshoff, C. S. Barry, O. Boutureira, M. K. Patel, F. D'Hooge, S. S. Lee, L. E. Via, K. Tahlan, C. E. Barry, B. G. Davis, *Nat. Chem. Biol.* 2011, 7, 228.
- [3] S. Sun, H. Zeng, D. B. Robinson, S. Raoux, P. M. Rice, S. X. Wang, G. Li, *J. Am. Chem. Soc.* 2003, 126, 273.
